# Supplementary material
Source: PubMed Central journal article supplement (PMC2833372)
Supplement: mmc1.pdf [file mmc1.pdf]

## Supplemental Data

### Human ITCH E3 Ubiquitin Ligase Deficiency

#### Causes Syndromic Multisystem Autoimmune Disease

Naomi J. Lohr, Jean P. Molleston, Kevin A. Strauss, Wilfredo Torres-Martinez, Eric A. Sherman, Robert H. Squires, Nicholas L. Rider, Kudakwashe R. Chikwava, Oscar W. Cummings, D. Holmes Morton, and Erik G. Puffenberger

| ITCH Primers | Sequence                    |
|--------------|-----------------------------|
| ITCHX1F      | gcctgctggggctttag           |
| ITCHX1R      | tctccccgaacatttctcatc       |
| ITCHX2F      | tgtgttaatggactctccttcctt    |
| ITCHX2R      | cttggcctctgcatcactct        |
| ITCHX3F      | tgggaatTTTTgatgtttacagtg    |
| ITCHX3R      | cctggccctctcaggattat        |
| ITCHX4F      | tgatggtacggggaaccctc        |
| ITCHX4R      | accagaaggagtcctaggaaaaag    |
| ITCHX5F      | tgtaaggggtgcagtgagaag       |
| ITCHX5R      | aatggtcaaaccaaggttactcag    |
| ITCHX6F      | gttcaaaccctgggtgaaacatag    |
| ITCHX6R      | aacctccaagctcaagcaatc       |
| ITCHX7F      | aaggcaggaatagtagtgcagtag    |
| ITCHX7R      | tctatctctccgatttctgtgg      |
| ITCHX8F      | ttagaagttttcatcctcctgctg    |
| ITCHX8R      | tgctcagtaacgtcaccttg        |
| ITCHX9F      | ctggcagcgttggttatctc        |
| ITCHX9R      | aaaaacagtcataaaaacaatggag   |
| ITCHX10F     | gattaaaaagccaggtaactcatgc   |
| ITCHX10R     | tggaacagagaaagggctgac       |
| ITCHX11F     | ctgcacctggcAAAAAG           |
| ITCHX11R     | gccatgctacttgccaccttc       |
| ITCHX12F     | attgccagggaaagggaaatc       |
| ITCHX12R     | tcccagacattcactcaagc        |
| ITCHX13F     | tcttgctgctgttggttgg         |
| ITCHX13R     | ggtgattaacgttttaggtctttgg   |
| ITCHX14F     | tgtacttggcaaacaagcaactc     |
| ITCHX14R     | gaaataactaagacttccactccttgc |
| ITCHX15F     | gggtgggatattttgctttcc       |
| ITCHX15R     | ccattttacctgtttttctgtgag    |
| ITCHX16F     | caatcttggtggttcttctgtttgc   |
| ITCHX16R     | caaggacttcaactcaagaagttcc   |
| ITCHX17F     | cgaaggagatgtcaaacctagaag    |
| ITCHX17R     | tgatgtgggtgaaatcaatcag      |
| ITCHX18F     | tgaggggtatagatccctgagaac    |
| ITCHX18R     | ctcatatgatctgttatggcacctaag |
| ITCHX19X20F  | atgcctgacccaggaagtg         |

|             |                          |
|-------------|--------------------------|
| ITCHX19X20R | agtgatcctgcatgacttttatcc |
| ITCHX21X22F | ggacatgtgtacagggggttc    |
| ITCHX21X22R | tgtgtggcttacttggcaatag   |
| ITCHX23F    | ctgctgcccaggagttagag     |
| ITCHX23R    | tggctatccctgtctttgttg    |
| ITCHX24F    | tgttggattggggaacacag     |
| ITCHX24R    | caggggtgaacaaaatgctc     |
| ITCHX25F    | tgatgggatcctttgaagcacag  |
| ITCHX25R    | ccttgacagtcgaagctaggc    |
